# Supplementary material
Source: ML conference proceedings conference paper supplement (https://proceedings.mlr.press/v119/golany20a.html)
Supplement: Supplementary file [file golany20a-supp.pdf]

---

# SimGANs: Simulator-Based Generative Adversarial Networks for ECG Synthesis to Improve Deep ECG Classification

---

Tomer Golany<sup>1</sup> Daniel Freedman<sup>2</sup> Kira Radinsky<sup>1</sup>

## A. Additional Experiments

We add additional experiments to demonstrate the contribution of SimGAN.

**ECG Generation using WGANs** We train a Wasserstein-GAN (Arjovsky et al., 2017) which minimizes the approximation of the Earth-Mover (EM) distance instead of the cross-entropy. The WGAN is trained without adding the euler loss term to the generator optimization.

**ECG Generation using SimWGANs** We train a Wasserstein-GAN with the Euler additional optimization loss added to the generator.

**Linear discriminant model** We add an additional experiment with a model not based on deep learning, which extracts ECG morphological features and then feeds them to a linear regression classifier.

We use the trained generators to generate synthetic ECG heartbeats, and add them to the base set which are then used to train the ResNet convolutional ECG heartbeat classifier.

Table 1. Comparison between Non-DL model, WGAN and SimWGAN. Best results are shown in bold and \*.

| HEARTBEAT CLASS | LINEAR DISCRIMINANT |      | WGAN |      | SIMWGAN       |               |
|-----------------|---------------------|------|------|------|---------------|---------------|
|                 | RE                  | PR   | RE   | PR   | RE            | PR            |
| SVEB (S)        | 0.4                 | 0.41 | 0.4  | 0.5  | * <b>0.5</b>  | * <b>0.63</b> |
| VEB (V)         | 0.76                | 0.81 | 0.85 | 0.83 | * <b>0.85</b> | * <b>0.87</b> |

Table 1 shows that for both type of classes, adding synthetic heartbeats generated from WGAN or SimWGAN to the training set, significantly outperforms classification performance compared to the performance of using only the original training set to train a linear discriminant. However, SimWGAN outperforms WGAN model across both classes. We conclude that adding the Euler loss term to a Wasserstein-GAN which minimizes the EM distance instead of the cross-entropy loss, improves its ability to generate realistic ECG heartbeats.

## References

Arjovsky, M., Chintala, S., and Bottou, L. Wasserstein gan. *arXiv preprint arXiv:1701.07875*, 2017.

---

<sup>1</sup>Technion - Israel Institute of Technology, Haifa, Israel <sup>2</sup>Google Research. Correspondence to: Tomer Golany <tomergolany@cs.technion.ac.il>, Kira Radinsky <kirar@cs.technion.ac.il>, Daniel Freedman <danielfreedman@google.com>.
